# Supplementary material for: Facile synthesis of magnetic core–shell nanocomposites for MRI and CT bimodal imaging
Source: Royal Society of Chemistry journal article supplement (doi:10.1039/c5tb00775e), 2015-01-01
Supplement: c5tb00775e1.pdf [file c5tb00775e1.pdf]

## Facile synthesis of magnetic core-shell nanocomposites for MRI and CT bimodal imaging

Jing Zhu, Jiaqing Wang, Xin Wang, Jingfen Zhu, Yanmei Yang, Jian Tian, Wenguo Cui, Cuicui Ge, Yonggang Li, Yue Pan\* and Hongwei Gu\*

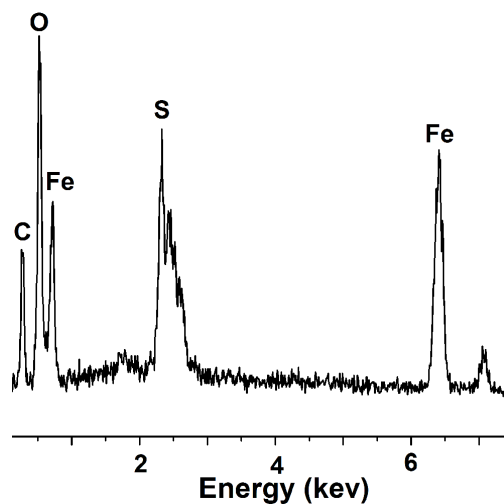

Fig. S1. EDS spectra of iron oxide@sulfur core-shell nanoparticles.

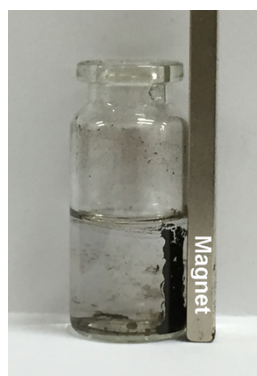

Fig. S2. A photograph was provided to show that the ION@Bi<sub>2</sub>S<sub>3</sub> core-shell nanocomposites can be easily attracted by a magnet.

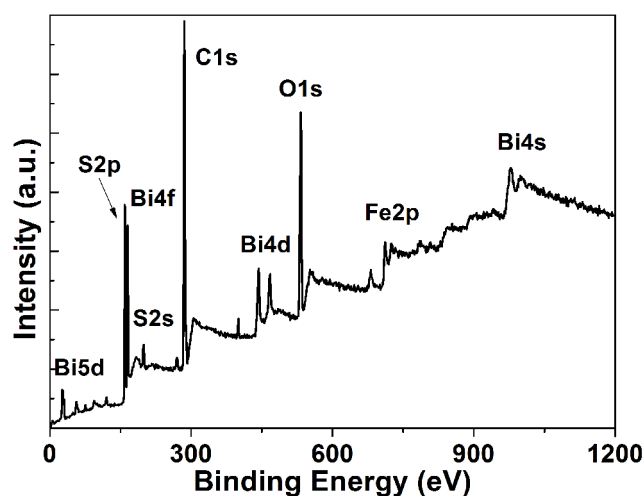

Fig. S3. XPS fully scanned spectrum of the prepared ION@Bi<sub>2</sub>S<sub>3</sub> core-shell nanocomposites.

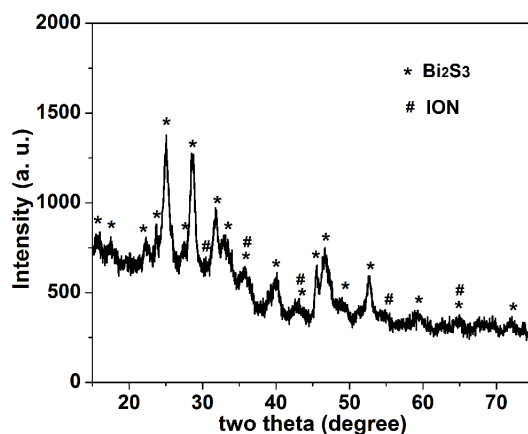

**Fig. S4.** XRD patterns of the as-synthesized ION@Bi<sub>2</sub>S<sub>3</sub> core-shell nanocomposites.

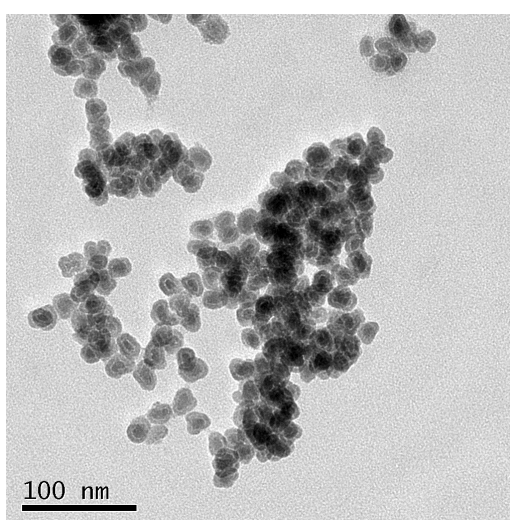

**Fig. S5.** TEM image of PEG-ION@Bi<sub>2</sub>S<sub>3</sub> core-shell nanocomposites in water.

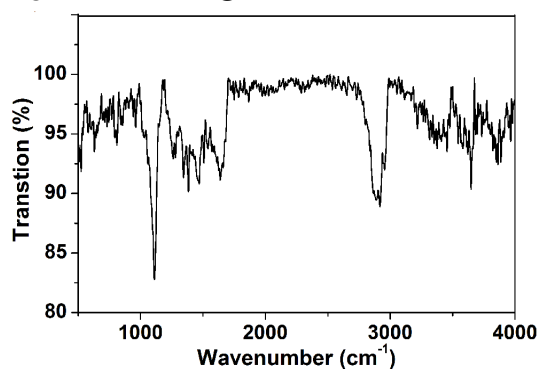

**Fig. S6.** FTIR spectrum of the as-synthesized PEG-ION@Bi<sub>2</sub>S<sub>3</sub> core-shell nanocomposites. The IR absorption bands around 2900 cm<sup>-1</sup> owing to the large amount of CH<sub>2</sub> groups in the PEG coating. Various additional peaks from 1000 to 1400 cm<sup>-1</sup> were likely due to stretching vibrations of the C-O bond in PEG.

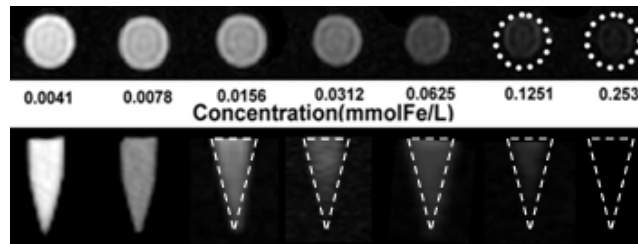

**Fig. S7.** *In vitro* T<sub>2</sub>-weighted MRI images of ION@Bi<sub>2</sub>S<sub>3</sub> core-shell nanocomposites at different concentrations (top: transverse view, bottom: vertical view).

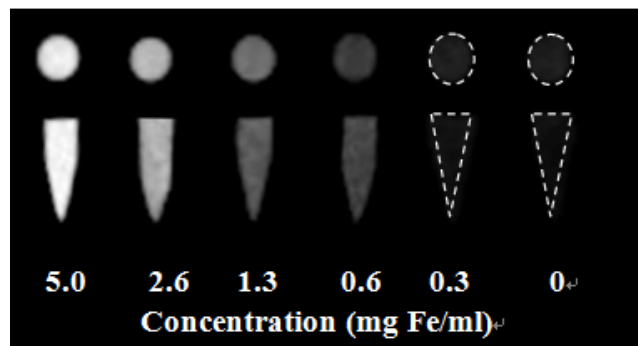

**Fig. S8.** *In vitro* CT images of ION@Bi<sub>2</sub>S<sub>3</sub> core-shell nanocomposites at different concentrations (top: transverse view, bottom: vertical view).

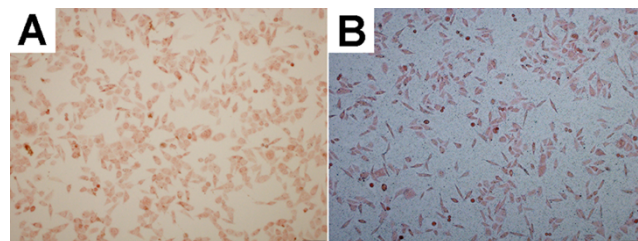

**Fig. S9.** Micrographs of Prussian blue stained HeLa cells with (A) control, (B) ION@Bi<sub>2</sub>S<sub>3</sub> nanocomposites.
